# Supplementary material for: Self-assembly of paramagnetic amphiphilic copolymers for synergistic therapy
Source: Royal Society of Chemistry journal article supplement (doi:10.1039/d0tb00405g), 2020-01-01
Supplement: d0tb00405g1.pdf [file d0tb00405g1.pdf]

## Electronic Supplementary Information

### Self-Assembly of Paramagnetic Amphiphilic Copolymers for Synergistic Therapy

Zhiliang Gao,<sup>a,1</sup> Weiwei Mu,<sup>c,1</sup> Yuan Tian,<sup>a</sup> Yimao Su,<sup>a</sup> Huanli Sun,<sup>d</sup> Gaorui Zhang,<sup>e</sup>  
Anning Li,<sup>e</sup> Dexin Yu,<sup>e</sup> Na Zhang,<sup>c</sup> Jingcheng Hao,<sup>a</sup> Yongjun Liu,<sup>\*,c</sup> and Jiwei Cui<sup>\*,a,b</sup>

<sup>a</sup>Key Laboratory of Colloid and Interface Chemistry of the Ministry of Education, School of Chemistry and Chemical Engineering, Shandong University, Jinan, Shandong 250100, China

<sup>b</sup>State Key Laboratory of Microbial Technology, Shandong University, Qingdao, Shandong 266237, China

<sup>c</sup>Key Laboratory of Chemical Biology of the Ministry of Education, School of Pharmaceutical Sciences, Shandong University, Jinan, Shandong 250012, China

<sup>d</sup>Jiangsu Key Laboratory of Advanced Functional Polymer Design and Application, College of Chemistry, Chemical Engineering and Materials Science, Soochow University, Suzhou, Jiangsu 215123, China

<sup>e</sup>Department of Radiology, Qilu Hospital, Shandong University, Jinan, Shandong 250012, China

<sup>1</sup>These authors contributed equally to this work.

**\*Correspondence authors:**

E-mail: [jwcui@sdu.edu.cn](mailto:jwcui@sdu.edu.cn)

E-mail: [liuyongjun@sdu.edu.cn](mailto:liuyongjun@sdu.edu.cn)

## Contents of Supporting Information

|                                                                               |    |
|-------------------------------------------------------------------------------|----|
| <b>Fig. S1.</b> Synthesis of PCL- <i>b</i> -PIEtMn·····                       | 3  |
| <b>Fig. S2.</b> <sup>1</sup> H NMR spectrum of synthesized polymers·····      | 4  |
| <b>Fig. S3.</b> Zeta potential of polymer NPs·····                            | 5  |
| <b>Fig. S4.</b> Stability of paramagnetic NPs in DPBS and culture medium····· | 6  |
| <b>Fig. S5.</b> Standard curve of DOX and IR-780 ·····                        | 7  |
| <b>Fig. S6.</b> Fluorescence intensity analysis of MCF-7 cells·····           | 8  |
| <b>Fig. S7.</b> Cross section analysis of MCF-7 cells·····                    | 9  |
| <b>Fig. S8.</b> Cytotoxicity of paramagnetic NPs·····                         | 10 |
| <b>Fig. S9.</b> Biodistribution of free IR-780 and NPs·····                   | 11 |
| <b>Fig. S10.</b> Qualitative analysis of biodistribution·····                 | 12 |
| <b>Fig. S11.</b> H&E staining images of organs·····                           | 13 |

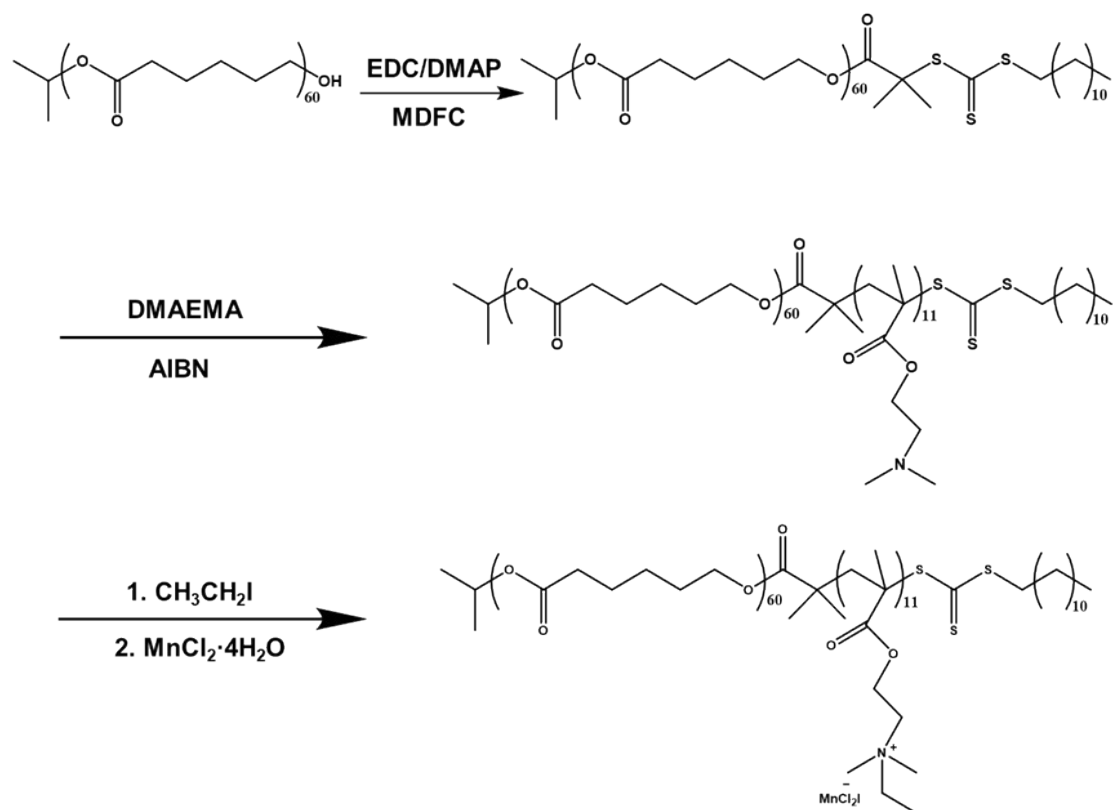

**Fig. S1.** Synthesis of PCL-*b*-PIEtMn.

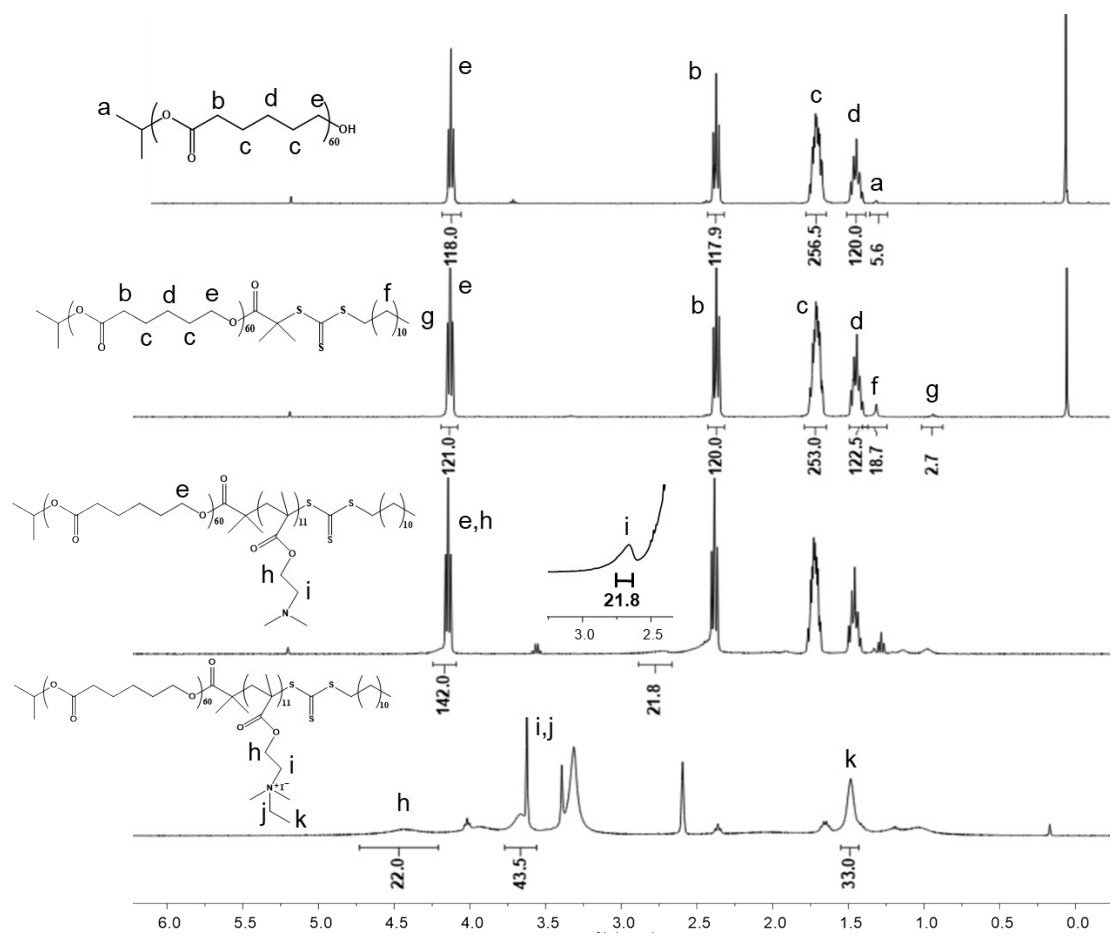

**Fig. S2.** <sup>1</sup>H NMR spectra (400MHz, CDCl<sub>3</sub>) of PCL, PCL-MDFC, PCL-*b*-PDMAEMA and PCL-*b*-PIEt.

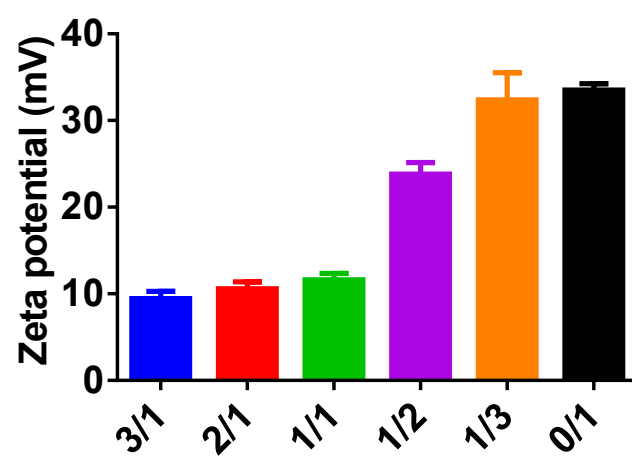

**Fig. S3.** Zeta potential of NPs with different mass ratio of PCL-*b*-PEG and PCL-*b*-PIEtMn.

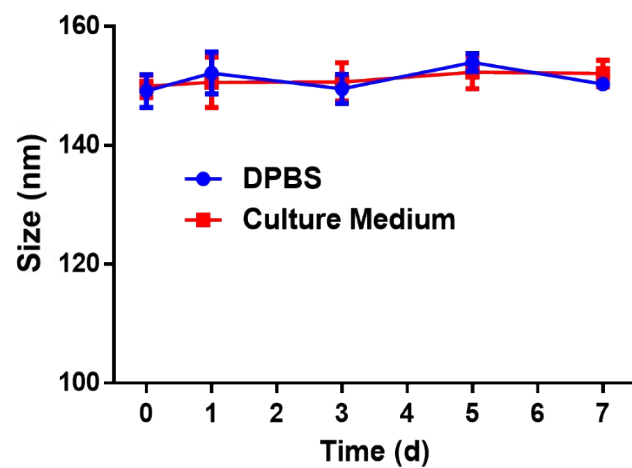

**Fig. S4.** Stability of paramagnetic NPs in DPBS and culture medium.

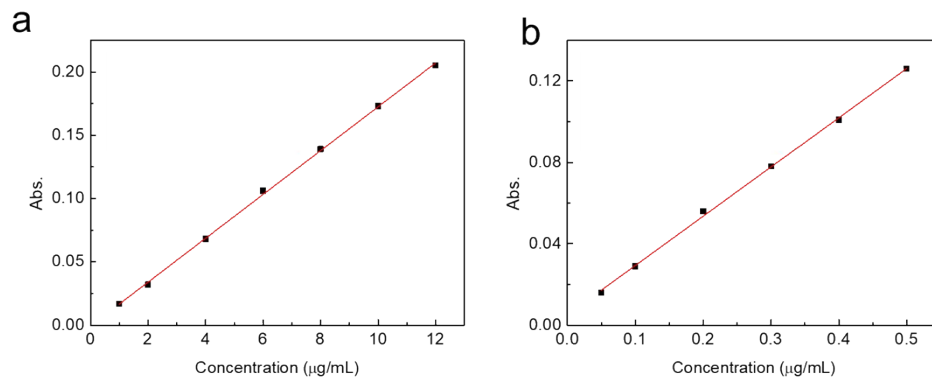

$$\text{DLC}_{\text{DOX}} = (\text{weight of loaded drug} / \text{weight of polymer}) = 5.3\%$$

$$\text{DLC}_{\text{IR780}} = (\text{weight of loaded drug} / \text{weight of polymer}) = 2.0\%$$

**Fig. S5.** Standard curve and drug loading contents (DLC) of (a) DOX and (b) IR-780.

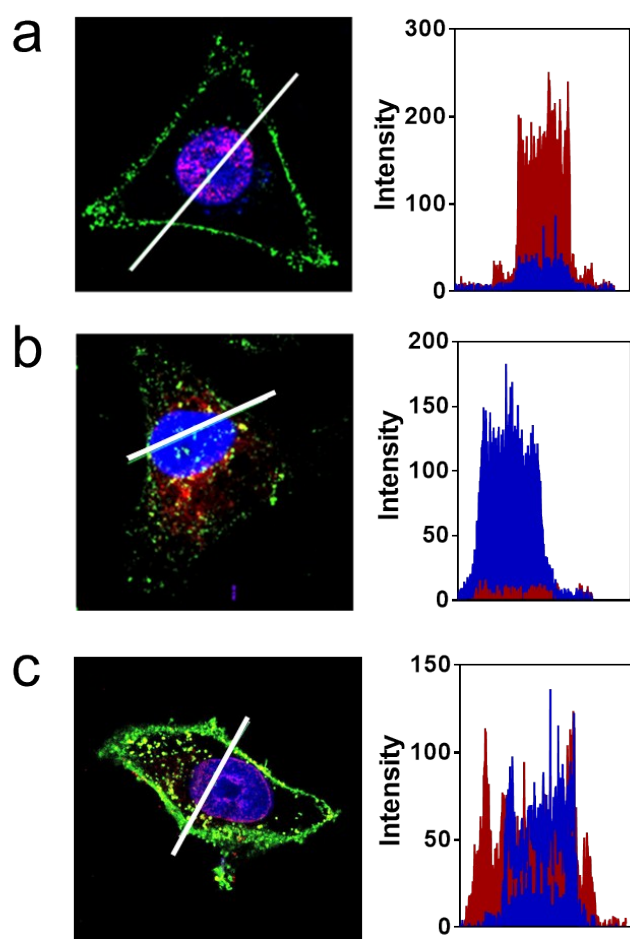

**Fig. S6.** CLSM images and fluorescence intensity analysis of MCF-7 cells after incubation with free (a) DOX, (b) DOX&IR-780@NPs L-, and (c) DOX&IR-780@NPs L+, respectively.



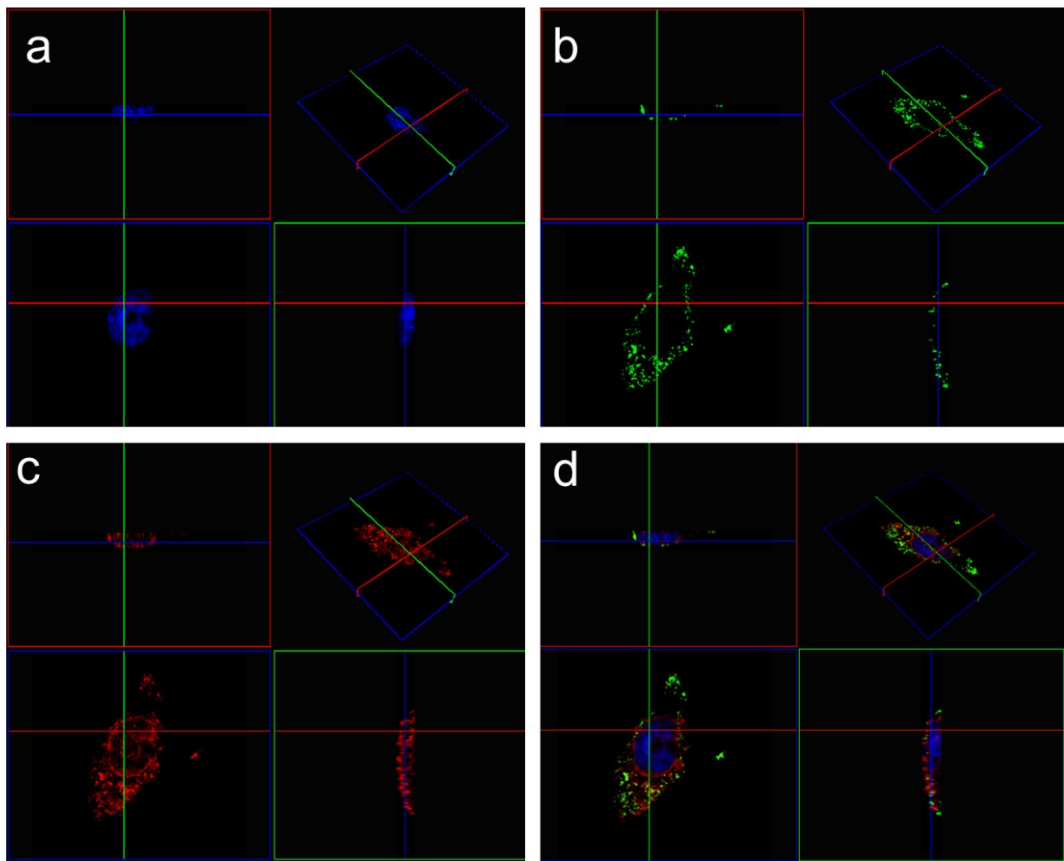

**Fig. S7.** Cross-section CLSM images of MCF-7 cells after incubation with DOX&IR-780@NPs L+. (a) Nucleus, (b) cell membrane, (c) DOX, and (d) overlay.

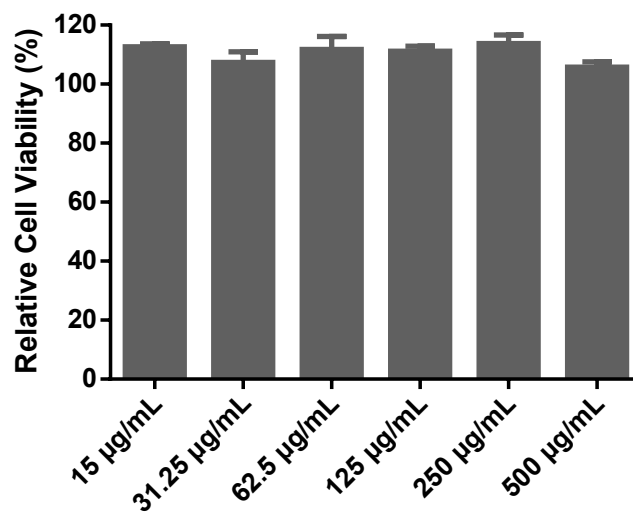

**Fig. S8.** Cytotoxicity of paramagnetic NPs. MCF-7 cells were incubated with paramagnetic NPs for 48 h before the ATPlite assay.

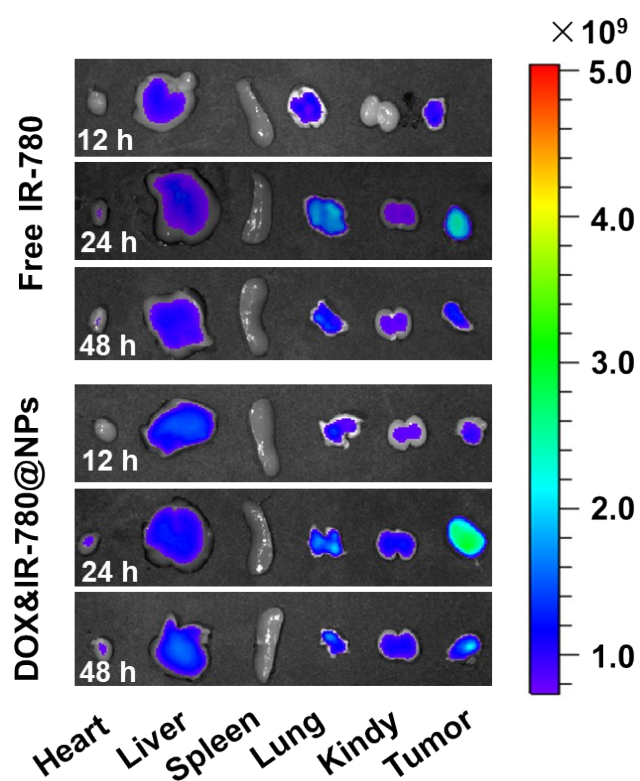

**Fig. S9.** Biodistribution of IR-780 in 4T1 tumor-bearing mice after intravenous injection of free IR-780 and DOX&IR-780@NPs at different time points.

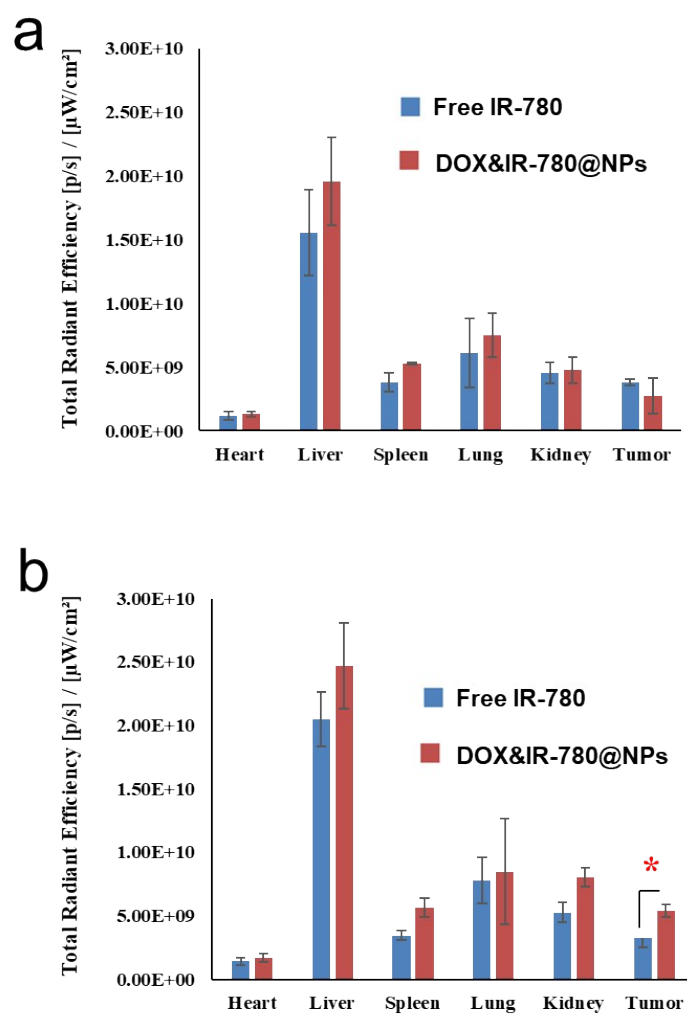

**Fig. S10.** Qualitative analysis of IR-780 intensities in different organs and tumors after injection of free IR-780 and DOX&IR-780@NPs at different time points. (a) 12 h, (b) 48 h.

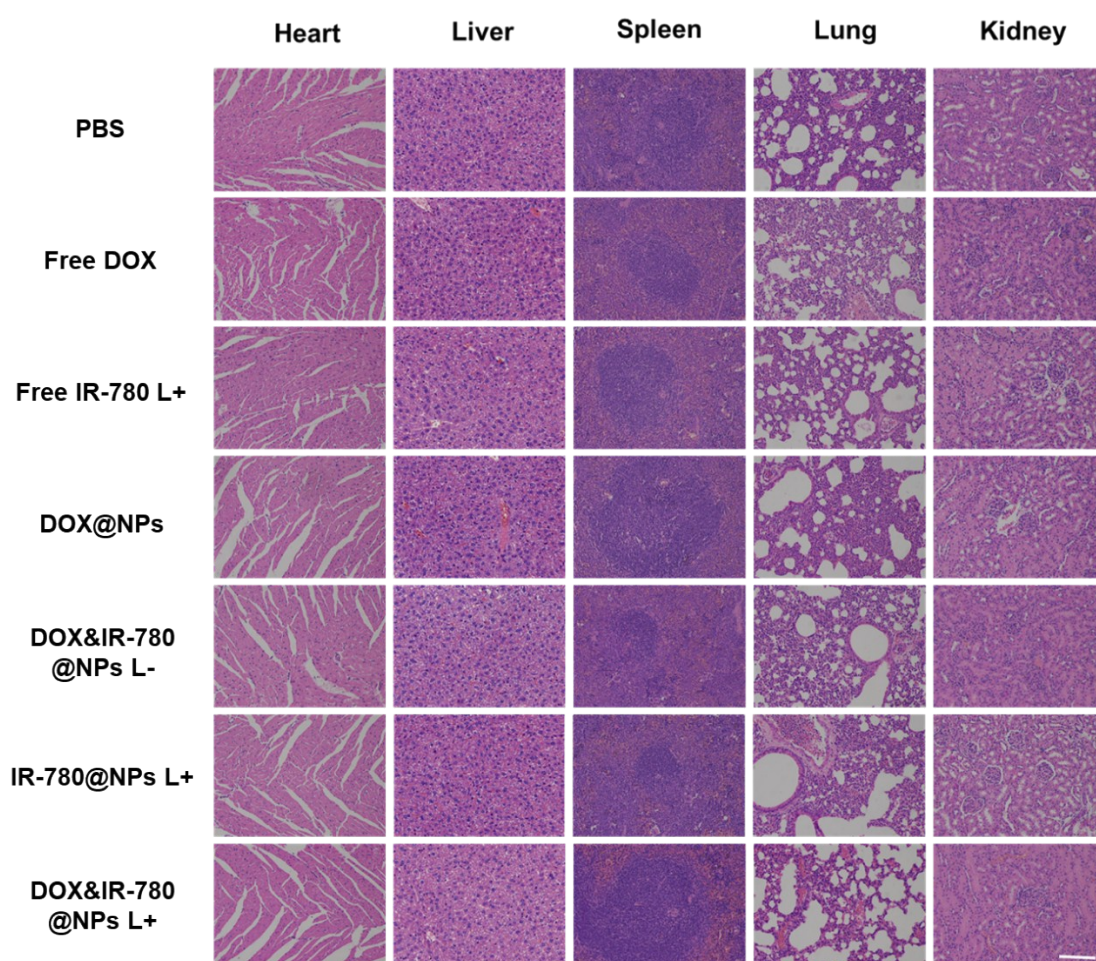

**Fig. S11.** H&E staining images of major organs after treatments. Scale bar is 100  $\mu$ m.
